# Supplementary material for: Geoelectrochemical CO production: Implications for the autotrophic origin of life
Source: PubMed Central journal article supplement — Sci Adv. 2018 Apr 4;4(4):eaao7265. doi: 10.1126/sciadv.aao7265 (PMC5884689; doi:10.1126/sciadv.aao7265), 2018-04-04
Supplement: aao7265_SM.pdf [file aao7265_SM.pdf]

## Supplementary Materials for **Geoelectrochemical CO production: Implications for the autotrophic origin of life**

Norio Kitadai, Ryuhei Nakamura, Masahiro Yamamoto, Ken Takai, Yamei Li, Akira Yamaguchi, Alexis Gilbert, Yuichiro Ueno, Naohiro Yoshida, Yoshi Oono

Published 4 April 2018, *Sci. Adv.* **4**, eaao7265 (2018)  
DOI: 10.1126/sciadv.aao7265

### **This PDF file includes:**

- fig. S1. A schematic of the electrochemical cell.
- fig. S2. Abiotic organic synthesis driven by the electrochemically generated reductive gas on CdS at  $-1.0$  V (versus SHE) in 100 mM NaCl saturated with 1 atm of CO<sub>2</sub>.
- fig. S3. X-ray diffraction patterns of metal sulfides.
- fig. S4. <sup>1</sup>H NMR spectra of the CO<sub>2</sub>-saturated 0.1 M NaCl after applying  $-1.2$  V (versus SHE) for 24 hours in the presence of metal sulfides.
- table S1. Summary of total current densities and FEs for CO<sub>2</sub> reduction on metal sulfides.
- table S2. Peak list of x-ray diffraction patterns of metal sulfides.

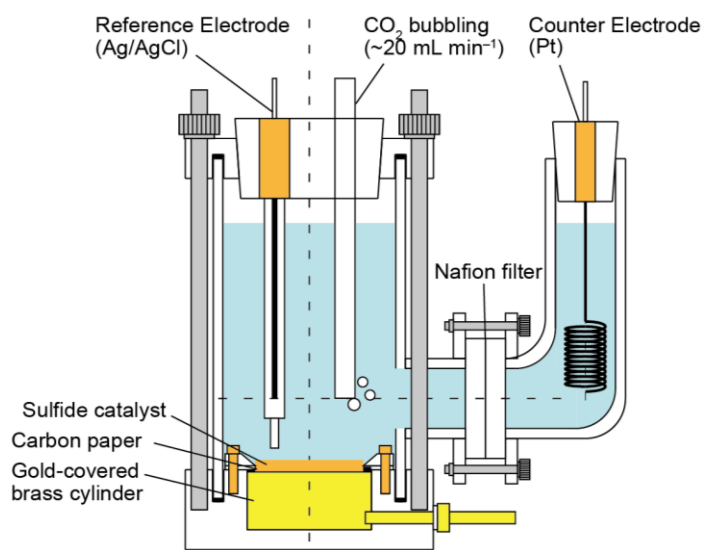

**fig. S1. A schematic of the electrochemical cell.** The cell is made of a Pyrex glass tube sandwiched between a polyoxymethylene (POM) cap and basement that were tightened together with stainless screws and knurled nuts. The cell has two compartments: a large working electrode side (~100 mL) and a small counter electrode side (~15 mL) that are separated by a proton exchange membrane (Nafion 117; DuPont). On the working electrode side, a gold-coated brass cylinder is placed at the center of the POM basement, and is coated with carbon paper (5.7 cm<sup>2</sup>) with a silicon and POM packings. An Ag/AgCl electrode (in saturated KCl) is used as the reference, and is fixed at a distance of less than 0.5 cm from the working electrode to reduce solution resistance. On the counter side, a platinum coil is inserted into the glass tube, and is used as the counter electrode

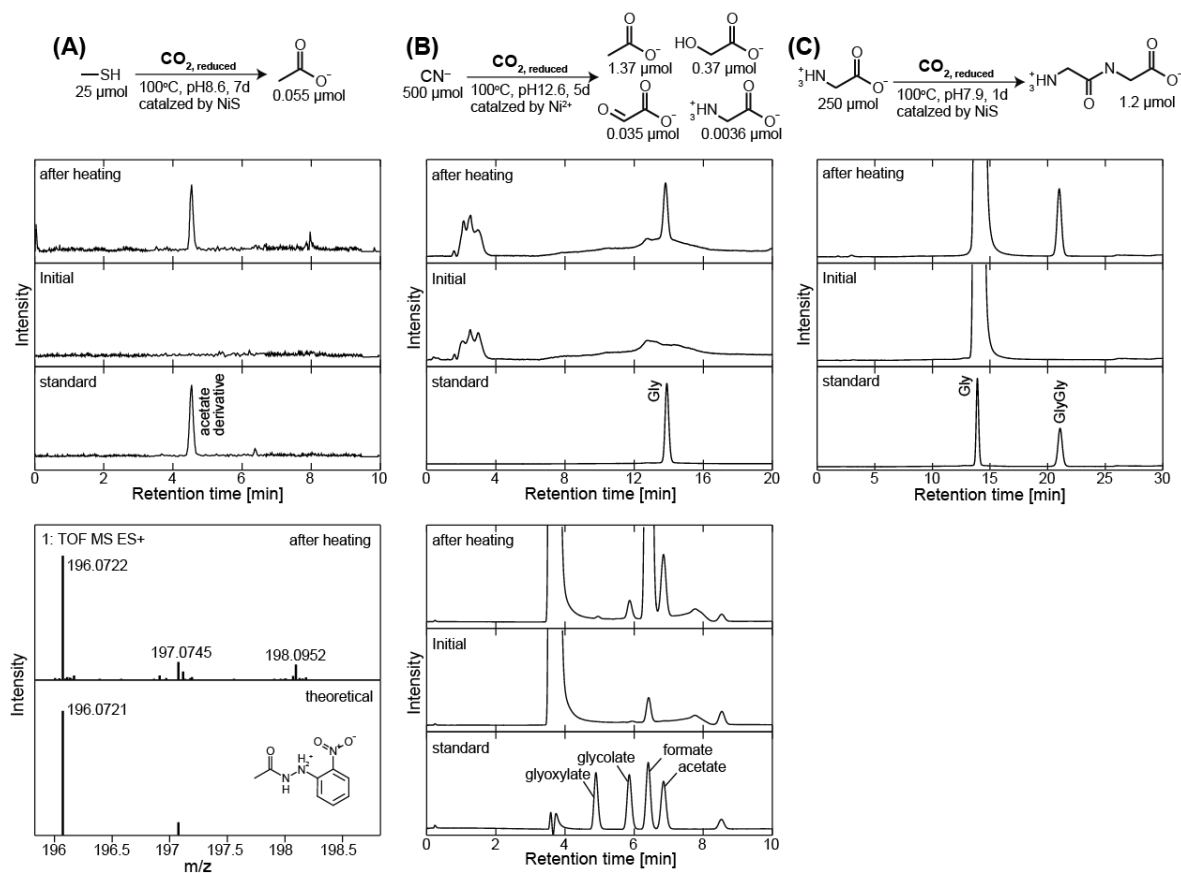

**fig. S2. Abiotic organic synthesis driven by the electrochemically generated reductive gas on CdS at  $-1.0$  V (versus SHE) in 100 mM NaCl saturated with 1 atm of  $\text{CO}_2$ .** The product chromatograms are shown together with those of the standards and initial samples. **(A)** Extracted ion chromatograms at the  $m/z$  between 196.047 and 196.111 (top) and mass spectrum at 4.55 min for the heated sample (bottom). **(B)** Chromatograms for glycine (top) and organic acids (bottom). **(C)** Chromatograms for glycine and glycylglycine.

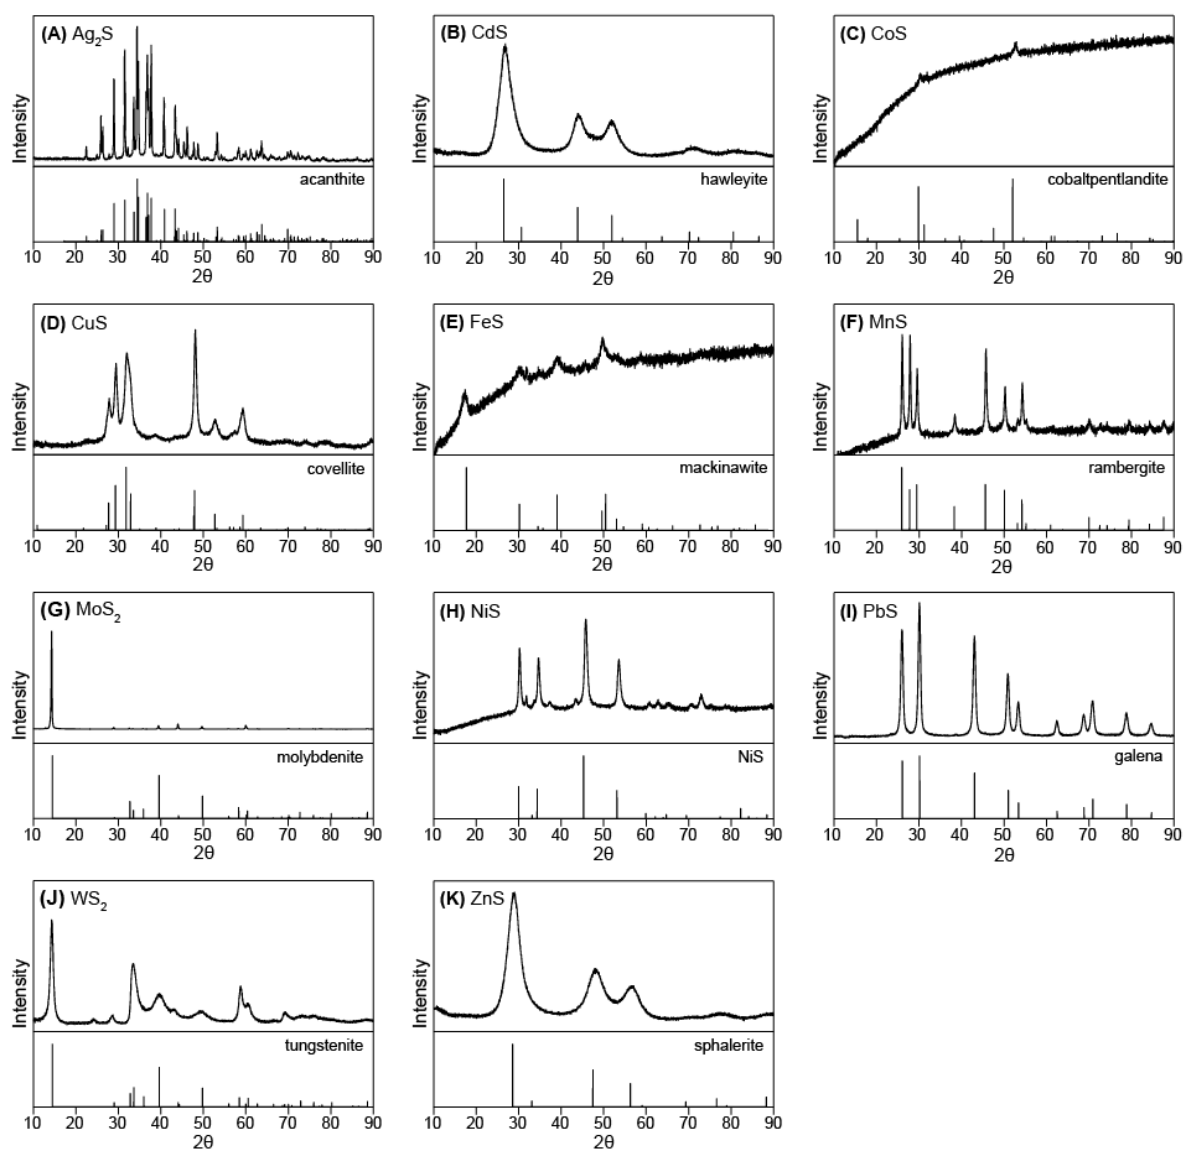

**fig. S3. X-ray diffraction patterns of metal sulfides.** All runs were conducted with  $2\theta$  ranging from  $10^\circ$  to  $90^\circ$  using  $0.02^\circ 2\theta$  step with a scan rate of  $1^\circ \text{ min}^{-1}$ . Reference patterns were taken from the PDF (Power Diffraction File) published by the International Centre for Diffraction Data. See table S2 for the peak positions and assignments.

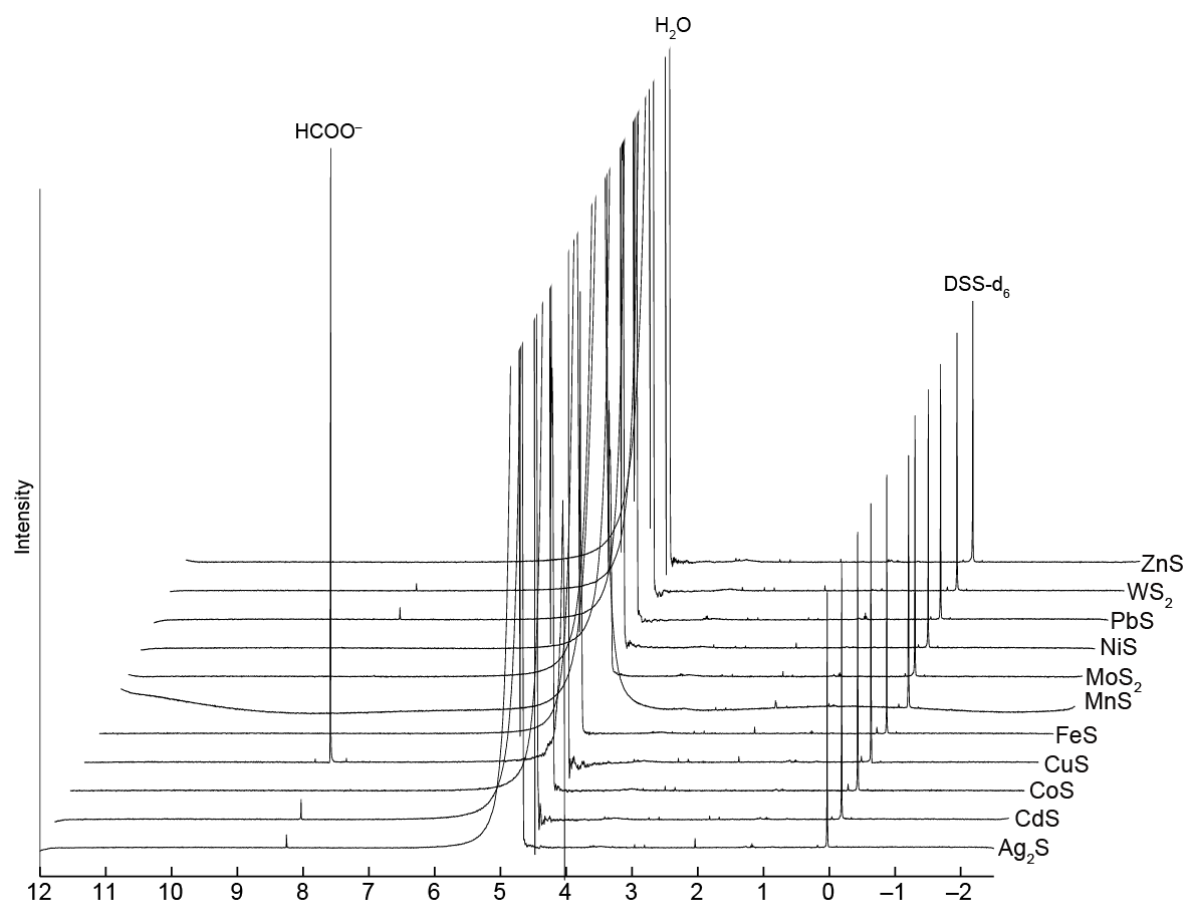

**fig. S4.**  $^1\text{H}$  NMR spectra of the  $\text{CO}_2$ -saturated 0.1 M NaCl after applying  $-1.2$  V (versus SHE) for 24 hours in the presence of metal sulfides.

**table S1. Summary of total current densities and FEs for CO<sub>2</sub> reduction on metal sulfides.**

| sulfide           | E [vs. SHE] | j [mA cm <sup>-2</sup> ] | HCOO <sup>-</sup> [%] | CO [%] |
|-------------------|-------------|--------------------------|-----------------------|--------|
| Ag <sub>2</sub> S | -0.6        | 0.20                     | 0.0                   | 0.0    |
|                   | -0.7        | 0.55                     | 0.0                   | 0.0    |
|                   | -0.8        | 1.32                     | 0.0                   | 0.0    |
|                   | -0.9        | 1.02                     | 0.1                   | 3.0    |
|                   | -0.95       | 1.26                     | 0.1                   | 2.9    |
|                   | -1.0        | 1.30                     | 0.2                   | 13.5   |
|                   | -1.1        | 1.81                     | 0.5                   | 29.1   |
|                   | -1.2        | 1.33                     | 0.5                   | 25.2   |
| CdS               | -0.6        | 0.01                     | 0.0                   | 0.0    |
|                   | -0.7        | 0.08                     | 0.0                   | 0.1    |
|                   | -0.8        | 0.10                     | 0.1                   | 0.4    |
|                   | -0.9        | 0.19                     | 0.4                   | 4.2    |
|                   | -0.95       | 0.22                     | 0.5                   | 15.3   |
|                   | -1.0        | 0.39                     | 1.4                   | 42.5   |
|                   | -1.1        | 0.39                     | 1.4                   | 33.5   |
|                   | -1.2        | 0.46                     | 1.6                   | 42.1   |
| CoS               | -0.8        | 0.86                     | 0.1                   | 0.1    |
|                   | -1.0        | 2.61                     | 0.1                   | 0.0    |
|                   | -1.2        | 8.86                     | 0.0                   | 0.0    |
| CuS               | -0.8        | 0.97                     | 0.3                   | 0.0    |
|                   | -1.0        | 4.04                     | 3.7                   | 0.0    |
|                   | -1.2        | 4.75                     | 4.7                   | 0.0    |
| FeS               | -0.8        | 0.96                     | 0.1                   | 0.1    |
|                   | -1.0        | 3.08                     | 0.0                   | 0.0    |
|                   | -1.2        | 9.60                     | 0.0                   | 0.0    |
| MnS               | -0.8        | 0.02                     | 0.0                   | 0.1    |
|                   | -1.0        | 0.13                     | 0.0                   | 0.0    |
|                   | -1.2        | 0.11                     | 0.0                   | 0.0    |
| MoS <sub>2</sub>  | -0.8        | 0.26                     | 0.6                   | 0.0    |
|                   | -1.0        | 1.77                     | 0.2                   | 0.0    |
|                   | -1.2        | 3.15                     | 0.0                   | 0.0    |
| NiS               | -0.8        | 1.26                     | 0.2                   | 0.0    |
|                   | -1.0        | 3.12                     | 0.0                   | 0.0    |
|                   | -1.2        | 5.88                     | 0.0                   | 0.0    |
| PbS               | -0.8        | 0.25                     | 0.0                   | 0.0    |
|                   | -1.0        | 0.81                     | 0.0                   | 0.1    |
|                   | -1.2        | 2.51                     | 0.3                   | 0.0    |
| WS <sub>2</sub>   | -0.8        | 0.73                     | 0.6                   | 0.0    |
|                   | -1.0        | 1.63                     | 0.3                   | 0.1    |
|                   | -1.2        | 6.09                     | 0.1                   | 0.0    |
| ZnS               | -0.8        | 0.02                     | 0.0                   | 0.0    |
|                   | -1.0        | 0.02                     | 0.0                   | 0.1    |
|                   | -1.2        | 0.84                     | 0.0                   | 0.0    |

**table S2. Peak list of x-ray diffraction patterns of metal sulfides.**

| Sulfide           | 2 $\theta$ [°] | Rel. Int.   | Assignment        |
|-------------------|----------------|-------------|-------------------|
| Ag <sub>2</sub> S | 22.4           | 9.4         | Acanthite         |
|                   | 24.9           | 3.0         | Acanthite         |
|                   | 25.9           | 32.2        | Acanthite         |
|                   | 26.3           | 23.4        | Acanthite         |
|                   | 27.8           | 3.4         | Halite            |
|                   | 28.9           | 63.8        | Acanthite         |
|                   | 31.5           | 89.7        | Acanthite         |
|                   | 32.2           | 7.2         | Halite            |
|                   | 33.6           | 47.7        | Acanthite         |
|                   | 34.4           | 100.0*      | Acanthite         |
|                   | 34.7           | 72.1        | Acanthite         |
|                   | 36.5           | 45.9        | Acanthite         |
|                   | 36.8           | 76.7        | Acanthite         |
|                   | 37.1           | 49.1        | Acanthite         |
|                   | 37.7           | 93.8        | Acanthite         |
|                   | 40.7           | 49.9        | Acanthite         |
|                   | 43.4           | 38.8        | Acanthite         |
|                   | 43.6           | 14.4        | Acanthite         |
|                   | 44.2           | 16.0        | Acanthite         |
|                   | 45.4           | 13.9        | Acanthite         |
|                   | 45.7           | 3.1         | Acanthite         |
|                   | 46.2           | 28.3        | Acanthite         |
|                   | 47.4           | 3.4         | Acanthite         |
|                   | 47.7           | 14.9        | Acanthite         |
|                   | 48.7           | 11.9        | Acanthite         |
|                   | 50.7           | 1.9         | Acanthite         |
|                   | 51.1           | 1.9         | Acanthite         |
|                   | 52.8           | 7.1         | Acanthite         |
|                   | 53.3           | 23.3        | Acanthite         |
|                   | 54.2           | 4.6         | Acanthite         |
|                   | 54.8           | 1.7         | Acanthite         |
|                   | 57.2           | 1.7         | Acanthite         |
|                   | 58.1           | 6.7         | Acanthite         |
|                   | 58.4           | 9.7         | Acanthite         |
|                   | 59.4           | 4.8         | Acanthite         |
|                   | 59.7           | 3.3         | Acanthite         |
| 60.0              | 7.2            | Acanthite   |                   |
| 61.1              | 7.7            | Acanthite   |                   |
| 62.6              | 6.8            | Acanthite   |                   |
| 63.2              | 5.3            | Acanthite   |                   |
| 63.7              | 16.1           | Acanthite   |                   |
| 64.3              | 2.3            | Acanthite   |                   |
| 65.8              | 2.1            | Acanthite   |                   |
| 69.8              | 6.4            | Acanthite   |                   |
| 70.4              | 3.2            | Acanthite   |                   |
| 70.6              | 6.1            | Acanthite   |                   |
| 71.4              | 2.5            | Acanthite   |                   |
| 72.3              | 5.0            | Acanthite   |                   |
| 74.8              | 1.6            | Acanthite   |                   |
| Ag <sub>2</sub> S | 86.3           | 2.4         | Acanthite         |
|                   | 89.5           | 1.5         | Acanthite         |
|                   |                |             |                   |
| CdS               | 26.7           | 100.0*      | Hawleyite         |
|                   | 43.9           | 31.6        | Hawleyite         |
|                   | 51.9           | 27.3        | Hawleyite         |
|                   | 71.3           | 5.4         | Hawleyite         |
|                   | 80.5           | 1.7         | Hawleyite         |
| CoS               | 30.0           | –           | Cobaltpentlandite |
|                   | 52.6           | 100.0*      | Cobaltpentlandite |
| CuS               | 27.7           | 28.0        | Covellite         |
|                   | 29.4           | 57.4        | Covellite         |
|                   | 31.8           | 22.3        | Covellite         |
|                   | 32.4           | 59.6        | Covellite         |
|                   | 48.0           | 100.0       | Covellite         |
|                   | 52.7           | 12.4        | Covellite         |
|                   | 59.3           | 28.5        | Covellite         |
| FeS               | 17.3           | 100.0*      | Mackinawite       |
|                   | 30.4           | –           | Mackinawite       |
|                   | 39.0           | –           | Mackinawite       |
|                   | 49.7           | –           | Mackinawite       |
| MnS               | 25.9           | 100*        | Rambergite        |
|                   | 27.8           | 99.9        | Rambergite        |
|                   | 29.5           | 64.4        | Rambergite        |
|                   | 38.4           | 14.5        | Rambergite        |
|                   | 45.7           | 83.6        | Rambergite        |
|                   | 50.2           | 40.2        | Rambergite        |
|                   | 54.3           | 42.1        | Rambergite        |
|                   | 55.1           | 7.7         | Rambergite        |
| 79.5              | 7.6            | Rambergite  |                   |
| MoS <sub>2</sub>  | 14.2           | 100*        | Molybdenite       |
|                   | 28.9           | 1.8         | Molybdenite       |
|                   | 32.5           | 1.0         | Molybdenite       |
|                   | 33.4           | 0.5         | Molybdenite       |
|                   | 35.7           | 0.5         | Molybdenite       |
|                   | 39.4           | 3.8         | Molybdenite       |
|                   | 44.0           | 6.4         | Molybdenite       |
|                   | 49.6           | 3.1         | Molybdenite       |
|                   | 55.9           | 0.4         | Molybdenite       |
|                   | 58.2           | 0.6         | Molybdenite       |
|                   | 60.0           | 4.9         | Molybdenite       |
|                   | 62.7           | 0.3         | Molybdenite       |
|                   | 70.0           | 0.7         | Molybdenite       |
|                   | 72.6           | 0.3         | Molybdenite       |
|                   | 75.9           | 0.2         | Molybdenite       |
| 77.5              | 0.5            | Molybdenite |                   |
| 78.1              | 0.2            | Molybdenite |                   |
| 80.1              | 0.2            | Molybdenite |                   |
| 86.6              | 0.1            | Molybdenite |                   |
| 88.6              | 0.5            | Molybdenite |                   |

| Sulfide | 2θ [°] | Rel. Int. | Assignment |
|---------|--------|-----------|------------|
| NiS     | 30.1   | 72.4      | NiS        |
|         | 31.7   | 12.8      | Halite     |
|         | 34.6   | 57.0      | NiS        |
|         | 37.3   | 6.5       | ?          |
|         | 43.3   | 6.5       | ?          |
|         | 45.7   | 100.0*    | NiS        |
|         | 53.5   | 51.7      | NiS        |
|         | 70.5   | 3.8       | NiS        |
| 73.1    | 13.5   | Halite    |            |
| PbS     | 25.9   | 80.6      | Galena     |
|         | 30.0   | 100.0*    | Galena     |
|         | 43.0   | 75.0      | Galena     |
|         | 50.9   | 47.2      | Galena     |
|         | 53.3   | 24.7      | Galena     |
|         | 62.4   | 10.9      | Galena     |
|         | 68.7   | 14.7      | Galena     |
|         | 70.8   | 26.1      | Galena     |

| Sulfide         | 2θ [°] | Rel. Int.   | Assignment  |
|-----------------|--------|-------------|-------------|
| PbS             | 78.8   | 16.3        | Galena      |
|                 | 84.8   | 8.5         | Galena      |
| WS <sub>2</sub> | 14.2   | 100*        | Tungstenite |
|                 | 24.1   | 4.1         | ?           |
|                 | 28.5   | 6.3         | Tungstenite |
|                 | 33.3   | 57.5        | Tungstenite |
|                 | 39.9   | 20.8        | Tungstenite |
|                 | 43.4   | 4.4         | Tungstenite |
|                 | 49.3   | 6.3         | Tungstenite |
|                 | 58.7   | 24.9        | Tungstenite |
|                 | 60.4   | 15.7        | Tungstenite |
| 69.1            | 6.9    | Tungstenite |             |
| 73.2            | 2.3    | Tungstenite |             |
| ZnS             | 29.1   | 100.0*      | Sphalerite  |
|                 | 48.0   | 34.5        | Sphalerite  |
|                 | 56.6   | 23.1        | Sphalerite  |
|                 | 78.7   | 3.3         | Sphalerite  |

**Continued.**
